# Supplementary material
Source: HighWire-hosted journal article supplement (https://erj.ersjournals.com/content/51/5/1800067)
Supplement: inline-supplementary-material-1 [file inline-supplementary-material-1.pdf]

## **In-depth hemodynamic phenotyping of pulmonary hypertension due to left heart disease**

Christian Gerges, MD\*, Mario Gerges, MD\*, Pierre Fesler, MD, PhD†, Anna Maria Pistritto, MD‡, Nicholas P Konowitz\*, Johannes Jakowitwsch, PhD\*, David S Celermajer, MD, PhD#, Irene M Lang, MD\*

From the \*Department of Internal Medicine II, Division of Cardiology, Vienna General Hospital, Medical University of Vienna; †Department of Internal Medicine Lapeyronie, CHU Montpellier and PhyMedExp, Univ Montpellier, CNRS, INSERM, Montpellier, France; ‡Department of Internal Medicine, Division of Cardiology, Ferrarotto Hospital, University of Catania; #Department of Cardiology, Sydney Medical School, University of Sydney.

**“Online Data Supplement”**

Table A. Response to inhaled nitric oxide in combined post- and pre-capillary pulmonary hypertension (Cpc-PH).

| PH-LHD (n=55)       |             |               |                    |                        |                |
|---------------------|-------------|---------------|--------------------|------------------------|----------------|
|                     | All Ipc-PH* | All Cpc-PH    | Cpc-PH             | Cpc-PH                 | Cp-PH          |
|                     | (n=20)      | (n=35)        | Classic responders | Non-classic responders | Non-responders |
| Relative change     |             |               | (n=3)              | (n=5)                  | (n=27)         |
| mPAP (%)            | +2±13       | <b>-10±16</b> | <b>-33±17</b>      | <b>-4±13</b>           | -4±13          |
| CO (%)              | +1±15       | <b>+7±18</b>  | <b>+33±18</b>      | +4±15                  | +4±15          |
| PVR (%)             | -5±33       | <b>-27±33</b> | <b>-55±8</b>       | <b>-17±32</b>          | <b>-17±32</b>  |
| R <sub>up</sub> (%) | +1±4        | <b>+10±15</b> | <b>+49±15</b>      | +6±17                  | <b>+13±14</b>  |

CO=cardiac output; mPAP= mean pulmonary artery pressure; PVR=pulmonary vascular resistance; R<sub>up</sub>=upstream resistance.

Statistically significant (p<0.05) relative changes from baseline are highlighted in **bold**. \*1 patient with Ipc-PH fulfilled non-classic responder criteria.

Table B. Response to inhaled nitric oxide in idiopathic pulmonary arterial hypertension (iPAH).

|                     | All iPAH      | Classic responders | Non-classic responders | Non-responders |
|---------------------|---------------|--------------------|------------------------|----------------|
| Relative change     | (n=31)        | (n=3)              | (n=9)                  | (n=19)         |
| mPAP (%)            | <b>-14±14</b> | <b>-42±5</b>       | <b>-7±9</b>            | <b>-6±9</b>    |
| CO (%)              | <b>8±11</b>   | 3±5                | <b>9±13</b>            | <b>9±12</b>    |
| PVR (%)             | <b>-27±17</b> | <b>-53±9</b>       | <b>-19±14</b>          | <b>-18±14</b>  |
| R <sub>up</sub> (%) | <b>10±17</b>  | <b>49±15</b>       | 8±12                   | 6±14           |

CO=cardiac output; mPAP= mean pulmonary artery pressure; PVR=22; R<sub>up</sub>=upstream resistance.

Statistically significant (p<0.05) relative changes from baseline are highlighted in **bold**.

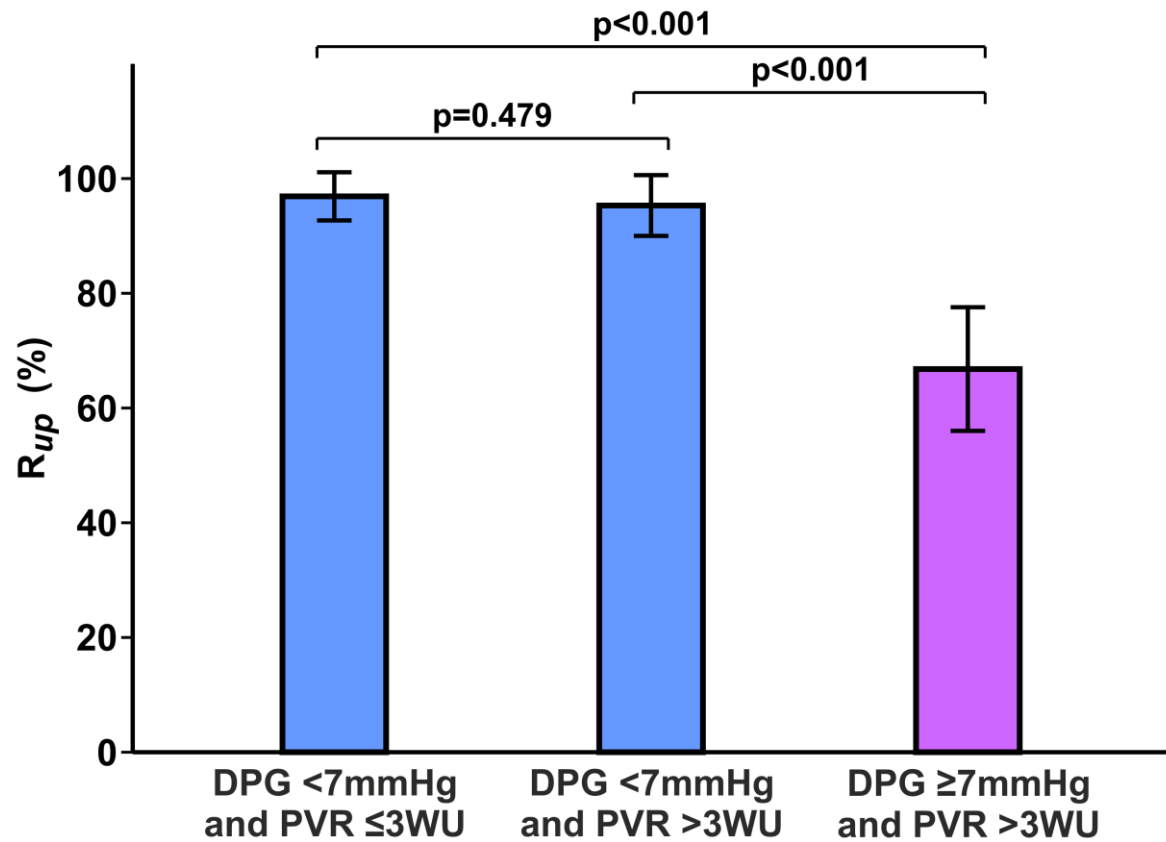

Figure A. Upstream resistance in pulmonary hypertension due to left heart disease.

Upstream resistance ( $R_{up}$ ) in pulmonary hypertension due to left heart disease with diastolic pulmonary vascular gradient (DPG) <7mmHg and pulmonary vascular resistance (PVR)  $\leq 3$ WU (n=6; left blue bar), DPG <7mmHg and PVR >3WU (n=14; right blue bar) and DPG  $\geq 7$ mmHg and PVR >3WU (n=35; purple bar). P-values are results of independent samples *t*-tests.
